# Supplementary material for: Unravelling the Evolution of the Allatostatin-Type A, KISS and Galanin Peptide-Receptor Gene Families in Bilaterians: Insights from Anopheles Mosquitoes
Source: PubMed Central journal article supplement (PMC4489612; doi:10.1371/journal.pone.0130347), 2015-07-02

**CP**

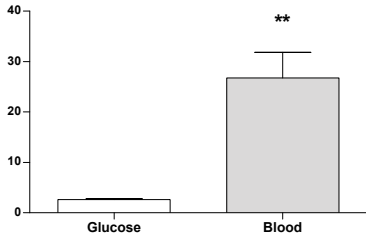

**Vgt**

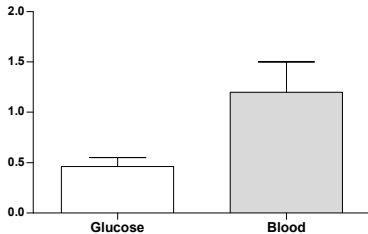

Supplement: pone.0130347.s001.pdf [file pone.0130347.s001.pdf]
