# Supplementary material for: Unravelling the Evolution of the Allatostatin-Type A, KISS and Galanin Peptide-Receptor Gene Families in Bilaterians: Insights from Anopheles Mosquitoes
Source: PubMed Central journal article supplement (PMC4489612; doi:10.1371/journal.pone.0130347), 2015-07-02
Supplement: pone.0130347.s002.pdf [file pone.0130347.s002.pdf]

|                            | AST-AR                                                | AST-A          | GALR                                                                | KISSR                                        |
|----------------------------|-------------------------------------------------------|----------------|---------------------------------------------------------------------|----------------------------------------------|
| <b>PROTOSTOMES</b>         |                                                       |                |                                                                     |                                              |
| <u>ARTHROPODA</u>          |                                                       |                |                                                                     |                                              |
| <i>I. scapularis</i>       | ISCW001334<br>ISCW0016381<br>ISCW016382<br>ISCW014938 | ISCW022939     |                                                                     |                                              |
| <i>T. urticae</i>          | tetur17G01230                                         | tetur06g00870  |                                                                     |                                              |
| <i>D. pulex</i>            | EFX62248<br>EFX71121<br>EFX75149                      | EFX87432       |                                                                     |                                              |
| <i>D. punctata</i>         | Ast-R <sup>1</sup>                                    | P12764.2       |                                                                     |                                              |
| <i>P. americana</i>        | AAK52473.1                                            | CAA62500.1     |                                                                     |                                              |
| <i>P. humanus</i>          | PHUM343230                                            | PHUM231810     |                                                                     |                                              |
| <i>R. prolixus</i>         | RPRC004706<br>RPRC004708<br>RPRC004705+#              | ACX47066       |                                                                     |                                              |
| <i>A. pisum</i>            | ACYPI008623                                           | ACYPI24660     |                                                                     |                                              |
| <i>A. cephalotes</i>       | ACEP10785                                             | DAA35078 (7)   |                                                                     |                                              |
| <i>S. invicta</i>          | SINV18345                                             | Scaffold03503* |                                                                     |                                              |
| <i>N. vitripennis</i>      | NV10415                                               | NV21997        |                                                                     |                                              |
| <i>A. mellifera</i>        | GB43574                                               | GB47928        |                                                                     |                                              |
| <i>B. mori</i>             | BGIBMGA005708                                         | BGIBMGA014377  |                                                                     |                                              |
| <i>D. plexippus</i>        | EHJ71577                                              | EHJ64275       |                                                                     |                                              |
| <i>H. melpomene</i>        | HMEL006667                                            | HMEL014728     |                                                                     |                                              |
| <i>A. aegypti</i>          | AAEL007169<br>AAEL006076<br>AAEL006077+#              | AAEL015251     |                                                                     |                                              |
| <i>C. quinquefasciatus</i> | Supcontig3.374*<br>CPIJ013095<br>CPIJ011118+#         | CPIJ008017     |                                                                     |                                              |
| <i>A. darlingi</i>         | Scaffold_325*#<br>Scaffold_130*<br>Scaffold_4146+#    | ADAC004794     |                                                                     |                                              |
| <i>A. gambiae</i>          | AGAP003658<br>AGAP001773<br>AGAP001774+#              | AGAP003712     |                                                                     |                                              |
| <i>D. melanogaster</i>     | FBgn0028961<br>FBgn0039595<br>C443560*                | FBgn0015591    |                                                                     |                                              |
| <i>M. scalaris</i>         | MESCA004796+#                                         | ni             |                                                                     |                                              |
| <u>NEMATODA</u>            |                                                       |                |                                                                     |                                              |
| <i>C. elegans</i>          | ZK455.3                                               |                |                                                                     |                                              |
| <u>ANNELIDA</u>            |                                                       |                |                                                                     |                                              |
| <i>C. teleta</i>           | ELT93650<br>ELU05381<br>ELU16355<br>ELT93995          |                | ELU13887                                                            | ELU15450                                     |
| <u>MOLLUSCA</u>            |                                                       |                |                                                                     |                                              |
| <i>L. gigantea</i>         | ESO84146                                              |                |                                                                     | ESO82200                                     |
| <b>DEUTEROSTOMES</b>       |                                                       |                |                                                                     |                                              |
| <u>HEMICHORDATA</u>        |                                                       |                |                                                                     |                                              |
| <i>S. kowalevskii</i>      | XP_002730936                                          |                | XP_002731810                                                        | XP_00681189<br>NP_001161574<br>XP_002735795  |
| <u>ECHINODERMATA</u>       |                                                       |                |                                                                     |                                              |
| <i>S. purpuratus</i>       |                                                       |                | SPU_022317                                                          | XP_00787561<br>XP_00784787<br>XP_00796286    |
| <u>CEPHALOCHORDATA</u>     |                                                       |                |                                                                     |                                              |
| <i>B. floridae</i>         |                                                       |                | XP_002609164<br>XP_002604982<br>EEN60991                            | EEN47971<br>XP_002611682<br>XP_002613701     |
| <u>TUNICATA</u>            |                                                       |                |                                                                     |                                              |
| <i>C. intestinalis</i>     |                                                       |                | XP_002122839<br>XP_002120122                                        |                                              |
| <u>VERTEBRATA</u>          |                                                       |                |                                                                     |                                              |
| <i>P. marinus</i>          |                                                       |                | ENSPMAP00000009466<br>ENSPMAP00000000353<br>ENSPMAP00000002955      | ENSPMAP00000001601                           |
| <i>C. milli</i>            |                                                       |                | SINCAMP00000007123<br>XP_007898764<br>XP_007886989<br>XP_0079003060 | XP_007898035<br>XP_007906481<br>XP_007906256 |

|                        |                                                                                                                              |                                                                                                                                                                                      |
|------------------------|------------------------------------------------------------------------------------------------------------------------------|--------------------------------------------------------------------------------------------------------------------------------------------------------------------------------------|
| <i>O. niloticus</i>    | XP_007907774<br>XP_003447310<br>XP_003443686<br>XP_003442232<br>XP_00344874                                                  | NP_001266708<br>XP_005459884                                                                                                                                                         |
| <i>D. rerio</i>        | XP_696215.1<br>ENSDARP00000111929<br>XP_002664053<br>XP_001339169                                                            | XP_005163556<br>ADV33377                                                                                                                                                             |
| <i>L. oculatus</i>     | XP_00664158,<br>XP_006635729<br>XP_006637044<br>XP_006635498<br>XP_006001469<br>XP_006012914<br>XP_005993296<br>XP_006013200 | ENSLOCP00000002832<br>ENSLOCP00000003036<br>ENSLOCP00000002856<br>ENSLOCP00000008391<br>KissR-1 <sup>2</sup><br>KissR-2 <sup>2</sup><br>KissR-3 <sup>2</sup><br>KissR-4 <sup>2</sup> |
| <i>X. tropicalis</i>   | NP_00107355<br>NP_001096443<br>XP_002934279<br>XP_002940025<br>XP_003219765<br>XP_003217293<br>XP_03221019                   | NP_001165296<br>NP_001163985<br>NP_001165295                                                                                                                                         |
| <i>A. carolinensis</i> | XP_003219765<br>XP_003217293<br>XP_03221019                                                                                  | XP_00321788                                                                                                                                                                          |
| <i>G. gallus</i>       | NP_001121534<br>NP_001122137<br>NP_001121535<br>NP_001124057                                                                 |                                                                                                                                                                                      |
| <i>H. sapiens</i>      | NP_001471<br>NP_003848<br>NP_003605                                                                                          | AAK83235                                                                                                                                                                             |

---
