# Supplementary material for: Unravelling the Evolution of the Allatostatin-Type A, KISS and Galanin Peptide-Receptor Gene Families in Bilaterians: Insights from Anopheles Mosquitoes
Source: PubMed Central journal article supplement (PMC4489612; doi:10.1371/journal.pone.0130347), 2015-07-02
Supplement: pone.0130347.s003.pdf [file pone.0130347.s003.pdf]

|                           | <b>5'-3'</b>             | <b>T°C</b> | <b>Efficiency (r<sup>2</sup>)</b> |
|---------------------------|--------------------------|------------|-----------------------------------|
| <b>Receptor isolation</b> |                          |            |                                   |
| <i>GPRALS1</i> fwd        | atgacgaacgagtctaaaatta   | 60         |                                   |
| <i>GPRALS1</i> rev        | tcataaggggtccgcgttcga    |            |                                   |
| <i>GPRALS2</i> fwd        | atggtaagcgagaactacacgc   | 60         |                                   |
| <i>GPRALS2</i> rev        | ttataaaatgtctggacagctg   |            |                                   |
| <b>q-PCR</b>              |                          |            |                                   |
| <i>S7</i> fwd             | cattctgccc aaaccgatgcgt  | 64         | 102% (r <sup>2</sup> =0.99)       |
| <i>S7</i> rev             | cgggaataaccagatcctccagg  |            |                                   |
| <i>MC</i> fwd             | cctgcccacgacggtcatttactt |            |                                   |
| <i>MC</i> rev             | cgtcccgccctttccttcttg    |            | 103% (r <sup>2</sup> =0.99)       |
| <i>Vtg</i> fwd            | acgaaaacctgaccgctct      | 60         | 103% (r <sup>2</sup> =0.99)       |
| <i>Vtg</i> rev            | cttgggacggatcaccaaat     |            |                                   |
| <i>CP</i> fwd             | cgttctcggaggttgagac      | 60         | 99.5% (r <sup>2</sup> =0.99)      |
| <i>CP</i> rev             | ctgcgagtacgagtggaacg     |            |                                   |
| <i>GPRALS1</i> fwd        | ggttgccgcgaaccagag       | 60         | 106% (r <sup>2</sup> =0.99)       |
| <i>GPRALS1</i> rev        | ccaatactctccgaagggc      |            |                                   |
| <i>GPRALS2</i> fwd        | gtccaaccacagatgcg        | 56         | 84% (r <sup>2</sup> =0.95)        |
| <i>GPRALS2</i> rev        | gacgctcttgccatagc        |            |                                   |
| <i>AST-A</i> fwd          | gctacatcattgaggacgtgcg   | 58         | 104% (r <sup>2</sup> =0.99)       |
| <i>AST-A</i> rev          | atcagtccatcgctactcgtaat  |            |                                   |
