# Supplementary material for: Unravelling the Evolution of the Allatostatin-Type A, KISS and Galanin Peptide-Receptor Gene Families in Bilaterians: Insights from Anopheles Mosquitoes
Source: PubMed Central journal article supplement (PMC4489612; doi:10.1371/journal.pone.0130347), 2015-07-02
Supplement: pone.0130347.s004.pdf [file pone.0130347.s004.pdf]

| <i>Human</i>                                                             |     |        |                       | <i>A. gambiae</i>                    |     |         |                       | <i>D. melanogaster</i> |     |        |                       | <i>C. elegans</i> |     |        |                       | <i>T. castaneum</i> |     |        |                       |
|--------------------------------------------------------------------------|-----|--------|-----------------------|--------------------------------------|-----|---------|-----------------------|------------------------|-----|--------|-----------------------|-------------------|-----|--------|-----------------------|---------------------|-----|--------|-----------------------|
| Gene                                                                     | chr | symbol | initial position (pb) | Gene                                 | chr | symbol  | initial position (pb) | Gene                   | chr | symbol | initial position (bp) | Gene              | chr | symbol | initial position (pb) | Gene                | chr | symbol | initial position (pb) |
| <b><i>Polypyrimidine tract binding protein (PTBP)</i></b>                |     |        |                       |                                      |     |         |                       |                        |     |        |                       |                   |     |        |                       |                     |     |        |                       |
| ENSG0000011304                                                           | 19  | PTBP1  | 797075                | AGAP003945                           | 2R  |         | 46708274              | FBgn0011224            | 3R  |        | 31846987              |                   |     |        |                       | TC011728            | 9   |        | 19360223              |
| ENSG00000117569                                                          | 1   | PTBP2  | 96721665              |                                      |     |         |                       |                        |     |        |                       |                   |     |        |                       |                     |     |        |                       |
| ENSG00000119314                                                          | 9   | PTBP3  | 112217716             |                                      |     |         |                       |                        |     |        |                       |                   |     |        |                       |                     |     |        |                       |
| <b><i>Allatostatin/KISSR</i></b>                                         |     |        |                       |                                      |     |         |                       |                        |     |        |                       |                   |     |        |                       |                     |     |        |                       |
| ENSG00000116014                                                          | 19  | KISS1R | 917287                | AGAP003658                           | 2R  | GPRALS1 | 41239013              | FBgn0028961            | X   | DAR-1  | 3574536               | WBGene00013974    | X   | NPR-9  | 11328591              |                     |     |        |                       |
|                                                                          |     |        |                       | AGAP001773                           | 2R  | GPRALS2 | 9766909               | FBgn0039595            | 3R  | DAR-2  | 28737109              |                   |     |        |                       |                     |     |        |                       |
|                                                                          |     |        |                       | AGAP001774                           | 2R  |         | 10041418              |                        |     |        |                       |                   |     |        |                       |                     |     |        |                       |
| <b><i>ecotropic viral integration site 5 proteins (EVI5)</i></b>         |     |        |                       |                                      |     |         |                       |                        |     |        |                       |                   |     |        |                       |                     |     |        |                       |
| ENSG00000142459                                                          | 19  | EVI5L  | 7830233               | AGAP002354                           | 2R  |         | 20571876              | FBgn0262740            | X   |        | 11430523              | WBGene00020770    | X   |        | 16399210              | TC002602            | 3   |        | 24800274              |
| ENSG00000067208                                                          | 1   | EVI5   | 92508696              |                                      |     |         |                       |                        |     |        |                       |                   |     |        |                       |                     |     |        |                       |
| <b><i>DOT1-like histone H3K79 methyltransferase proteins (DOT1L)</i></b> |     |        |                       |                                      |     |         |                       |                        |     |        |                       |                   |     |        |                       |                     |     |        |                       |
| ENSG00000104885                                                          | 19  | DOT1L  | 2164149               | AGAP003282                           | 2R  |         | 34856256              | FBgn0264495            | 3R  |        | 6406855               | WBGene00022512    | X   |        | 1917469               | TC013593            | X   |        | 4314300               |
|                                                                          |     |        |                       |                                      |     |         |                       |                        |     |        |                       | WBGene00010067    | X   |        | 11867971              |                     |     |        |                       |
|                                                                          |     |        |                       |                                      |     |         |                       |                        |     |        |                       | WBGene00010120    | X   |        | 11929899              |                     |     |        |                       |
|                                                                          |     |        |                       |                                      |     |         |                       |                        |     |        |                       | WBGene00012302    | X   |        | 12301590              |                     |     |        |                       |
| <b><i>outer dense fiber of sperm tails 3 protein (ODF3L)</i></b>         |     |        |                       |                                      |     |         |                       |                        |     |        |                       |                   |     |        |                       |                     |     |        |                       |
| ENSG00000104885                                                          | 19  | ODF3L2 | 43346                 | AGAP001620                           | 2R  |         | 6966595               | FBgn0039104            | 3R  |        | 23695221              |                   |     |        |                       | TC009948            | 7   |        | 14413903              |
|                                                                          |     |        |                       | <b><i>Homeobox protein unc-4</i></b> |     |         |                       |                        |     |        |                       |                   |     |        |                       |                     |     |        |                       |
|                                                                          |     |        |                       | AGAP001495                           | 2R  | unc-4   | 5610198               | FBgn0024184            | X   |        | 17768569              |                   |     |        |                       |                     |     |        |                       |
|                                                                          |     |        |                       | <b><i>wide awake (wake)</i></b>      |     |         |                       |                        |     |        |                       |                   |     |        |                       |                     |     |        |                       |
|                                                                          |     |        |                       | AGAP001726                           | 2R  |         | 8941088               | FBgn0266418            | 3R  | wake   | 22639808              | WBGene00019935    | X   |        | 5959115               | TC005383            | 8   |        | 17302996              |
|                                                                          |     |        |                       | <b><i>string (stg)</i></b>           |     |         |                       |                        |     |        |                       |                   |     |        |                       |                     |     |        |                       |
|                                                                          |     |        |                       | AGAP012963                           | 2R  |         | 36867688              | FBgn0064123            | X   | stg    | 21093844              |                   |     |        |                       | TC006018            | 8   |        | 2899353               |
