# Supplementary material for: Unravelling the Evolution of the Allatostatin-Type A, KISS and Galanin Peptide-Receptor Gene Families in Bilaterians: Insights from Anopheles Mosquitoes
Source: PubMed Central journal article supplement (PMC4489612; doi:10.1371/journal.pone.0130347), 2015-07-02
Supplement: pone.0130347.s005.pdf [file pone.0130347.s005.pdf]

| <b>Human</b>                                                               |     |        |                       | <b>A. gambiae</b> |     |        |                       | <b>D. melanogaster</b> |     |        |                       | <b>C. elegans</b> |     |        |                       | <b>T. castaneum</b> |     |        |                       |
|----------------------------------------------------------------------------|-----|--------|-----------------------|-------------------|-----|--------|-----------------------|------------------------|-----|--------|-----------------------|-------------------|-----|--------|-----------------------|---------------------|-----|--------|-----------------------|
| Gene                                                                       | chr | symbol | initial position (bp) | Gene              | chr | symbol | initial position (bp) | Gene                   | chr | symbol | initial position (bp) | Gene              | chr | symbol | initial position (bp) | Gene                | chr | symbol | initial position (bp) |
| <b><i>inward rectifying potassium channel superfamily (KCNJ)</i></b>       |     |        |                       |                   |     |        |                       |                        |     |        |                       |                   |     |        |                       |                     |     |        |                       |
| ENSG00000162728                                                            | 1   | KCNJ9  | 160081570             | AGAP001280        | 2R  |        | 2263694               | FBgn0039061            | 3R  |        | 23168317              | WBGene0002149     | X   |        | 6766579               | TC006706            | 8   |        | 16260797              |
| ENSG00000177807                                                            | 1   | KCNJ10 | 160037467             | AGAP001281        | 2R  |        | 2268140               | FBgn0039081            | 3R  |        | 23513617              | WBGene00002150    | X   |        | 702974                | TC006707            | 8   |        | 16270824              |
| ENSG00000121361                                                            | 12  | KCNJ8  | 21764955              | AGAP001283        | 2R  |        | 2276105               |                        |     |        |                       |                   |     |        |                       |                     |     |        |                       |
| ENSG00000182324                                                            | 19  | KCNJ14 | 48455509              | AGAP001284        | 2R  |        | 2280076               |                        |     |        |                       |                   |     |        |                       |                     |     |        |                       |
| ENSG00000187486                                                            | 11  | KCNJ11 | 17385859              |                   |     |        |                       |                        |     |        |                       |                   |     |        |                       |                     |     |        |                       |
| ENSG00000151704                                                            | 11  | KCNJ1  | 128836315             |                   |     |        |                       |                        |     |        |                       |                   |     |        |                       |                     |     |        |                       |
| ENSG00000120457                                                            | 11  | KCNJ5  | 128891356             |                   |     |        |                       |                        |     |        |                       |                   |     |        |                       |                     |     |        |                       |
| <b><i>LAR protein-tyrosine phosphatase-interacting protein (PPFIA)</i></b> |     |        |                       |                   |     |        |                       |                        |     |        |                       |                   |     |        |                       |                     |     |        |                       |
| ENSG00000143847                                                            | 1   | PPFIA4 | 203026498             | AGAP001469        | 2R  |        | 5341315               |                        |     |        |                       | WBGene00006364    | X   |        | 10549123              | TC012918            | 2   |        | 3628762               |
| ENSG00000139220                                                            | 12  | PPFIA2 | 81257975              |                   |     |        |                       |                        |     |        |                       | WBGene00011904    | X   |        | 13865038              |                     |     |        |                       |
| ENSG00000177380                                                            | 19  | PPFIA3 | 49119389              |                   |     |        |                       | FBgn0034720            | 2R  |        | 22333500              |                   |     |        |                       |                     |     |        |                       |
| ENSG00000131626                                                            | 11  | PPFIA1 | 70270700              |                   |     |        |                       |                        |     |        |                       |                   |     |        |                       |                     |     |        |                       |
| <b><i>Golgi Transport (GOLT)</i></b>                                       |     |        |                       |                   |     |        |                       |                        |     |        |                       |                   |     |        |                       |                     |     |        |                       |
| ENSG00000174567                                                            | 1   | GOLT1A | 204198160             | AGAP002357        | 2R  |        | 20595150              |                        |     |        |                       | WBGene00018270    | II  |        | 4740410               |                     |     |        |                       |
| ENSG00000111711                                                            | 12  | GOLT1B | 21501781              |                   |     |        |                       |                        |     |        |                       |                   |     |        |                       |                     |     |        |                       |
| <b><i>glycogen synthase (GYS)</i></b>                                      |     |        |                       |                   |     |        |                       |                        |     |        |                       |                   |     |        |                       |                     |     |        |                       |
| ENSG00000111713                                                            | 12  | GYS2   | 21536189              |                   |     |        |                       |                        |     |        |                       |                   |     |        |                       |                     |     |        |                       |
| ENSG00000104812                                                            | 19  | GYS1   | 48968125              | AGAP002586        | 2R  |        | 23292023              | FBgn0038293            | 3R  |        | 15141843              | WBGene00001793    | II  |        | 12866448              | TC015651            | 6   |        | 6648641               |
| <b><i>Allatostatin/Kiss/Galanin/Spexin (AST,KISS,GAL,SPX)</i></b>          |     |        |                       |                   |     |        |                       |                        |     |        |                       |                   |     |        |                       |                     |     |        |                       |
| ENSG00000170498                                                            | 1   | KISS1  | 204190341             | AGAP003712        | 2R  | ASTA   | 42302848              | FBgn0015591            | 3R  | ASTA   | 24760530              | WBGene00003744    | X   | NLP-6  | 17662458              |                     |     |        |                       |
| ENSG00000069482                                                            | 11  | GAL    | 68683779              |                   |     |        |                       |                        |     |        |                       |                   |     |        |                       |                     |     |        |                       |
| ENSG00000134548                                                            | 12  | SPX    | 21526307              |                   |     |        |                       |                        |     |        |                       |                   |     |        |                       |                     |     |        |                       |
| <b><i>aspartic protease family (REN, NAPSA, CTSD, CathD)</i></b>           |     |        |                       |                   |     |        |                       |                        |     |        |                       |                   |     |        |                       |                     |     |        |                       |
| ENSG00000143839                                                            | 1   | REN    | 204154819             | AGAP003277        | 2R  |        | 34793432              | FBgn0029093            | 2R  |        | 7822111               | WBGene00000216    | X   |        | 6791064               | TC004989            | 2   |        | 3124353               |
| ENSG00000143839                                                            | 19  | NAPSA  | 50358477              |                   |     |        |                       | FBgn0033933            | 2R  |        | 14390696              | WBGene00000217    | X   |        | 13218977              |                     |     |        |                       |
| ENSG00000117984                                                            | 11  | CTSD   | 1752752               |                   |     |        |                       |                        |     |        |                       |                   |     |        |                       |                     |     |        |                       |
| <b><i>N-acylneuraminate cytidyltransferase (CMAS)</i></b>                  |     |        |                       |                   |     |        |                       |                        |     |        |                       |                   |     |        |                       |                     |     |        |                       |
| ENSG00000111726                                                            | 12  | CMAS   | 22046174              | AGAP004527        | 2R  |        | 57391338              |                        |     |        |                       |                   |     |        |                       | TC015995            | 8   |        | 1531685               |
|                                                                            |     |        |                       | AGAP012963        | 2R  |        | 36867688              | FBgn0064123            | X   | stg-1  | 21093844              |                   |     |        |                       | TC006018            | 8   |        | 2899353               |
