# Supplementary material for: Unravelling the Evolution of the Allatostatin-Type A, KISS and Galanin Peptide-Receptor Gene Families in Bilaterians: Insights from Anopheles Mosquitoes
Source: PubMed Central journal article supplement (PMC4489612; doi:10.1371/journal.pone.0130347), 2015-07-02
Supplement: pone.0130347.s006.pdf [file pone.0130347.s006.pdf]

| Species                          | Strain           | Chromosome/<br>Scaffold | Predicted<br>Transcripts                           | E1                       | I1           | E2         | I2  | E3         | I3  | E4         | I4    | E5         | I5   | E6        | I6  | E7         | I7  | E8         |
|----------------------------------|------------------|-------------------------|----------------------------------------------------|--------------------------|--------------|------------|-----|------------|-----|------------|-------|------------|------|-----------|-----|------------|-----|------------|
| <i>Anopheles gambiae</i>         | PEST             | 2R                      | AGAP003658-RA<br>AGAP003658-RB                     | <b>247</b><br><b>247</b> | 784<br>18189 | <b>155</b> | 141 | <b>131</b> | 393 | <b>148</b> | 16596 | <b>120</b> | 6941 | <b>63</b> | 71  | <b>165</b> | 502 | <b>105</b> |
|                                  | Pimperena/S-form | scf_1106392397132       |                                                    | <b>247</b>               | 7284         | <b>158</b> | 139 | <b>131</b> | 399 | <b>150</b> | 17612 | <b>126</b> | 7259 | <b>82</b> | 67  | <b>161</b> | 495 | <b>107</b> |
| <i>Anopheles coluzzii</i>        | Mali-NIH         | scf_1925491385          | ACOM028757-RA*                                     | <b>247</b>               | 7225         | <b>158</b> | 139 | <b>131</b> | 402 | <b>150</b> | 17176 | <b>126</b> | 6867 | <b>82</b> | 67  | <b>161</b> | 584 | <b>107</b> |
| <i>Anopheles albimanus</i>       | STECLA strain    | KB672446                | AALB009020-RA*<br>AALB009019-RA*                   | <b>ni</b>                | ni           | <b>158</b> | 85  | <b>128</b> | 116 | <b>150</b> | 13124 | <b>123</b> | 3567 | <b>81</b> | 94  | <b>161</b> | 299 | <b>107</b> |
| <i>Anopheles arabiensis</i>      | Dongola          | KB704407                | AARA010137-RA*<br>AARA010136-RA*<br>AARA010135-RA* | <b>247</b>               | 5407         | <b>158</b> | 136 | <b>131</b> | 396 | <b>150</b> | 17575 | <b>126</b> | 6576 | <b>82</b> | 67  | <b>161</b> | 506 | <b>107</b> |
| <i>Anopheles atroparvus</i>      | EBRO             | scf_1925491385          | AATE010991-RA*<br>AATE011451-RA*                   | <b>133*</b>              | 5123         | <b>158</b> | 135 | <b>128</b> | 363 | <b>150</b> | 15709 | <b>123</b> | ni   | <b>ni</b> | ni  | <b>161</b> | 540 | <b>110</b> |
| <i>Anopheles culicifacies A</i>  | A-37             | KI422474                | ACUA006292-RA*<br>ACUA003786-RA*                   | <b>237</b>               | 5072         | <b>158</b> | 106 | <b>128</b> | 319 | <b>149</b> | 16734 | <b>120</b> | 3723 | <b>81</b> | 79  | <b>160</b> | 377 | <b>107</b> |
| <i>Anopheles dirus A</i>         | WR AIR2          | KB672713                | ADIR005565-RA*<br>ADIR005564-RA*                   | <b>243</b>               | 6451         | <b>158</b> | 76  | <b>128</b> | 399 | <b>149</b> | 27818 | <b>120</b> | 7019 | <b>86</b> | 70  | <b>162</b> | 431 | <b>107</b> |
| <i>Anopheles epiroticus</i>      | Epiroticus2      | KB670724                | AEPI001641-RA*<br>AEPI001640-RA*                   | <b>247</b>               | 5138         | <b>158</b> | 118 | <b>128</b> | 340 | <b>150</b> | 12959 | <b>120</b> | 4515 | <b>81</b> | 88  | <b>162</b> | 490 | <b>107</b> |
| <i>Anopheles farauti</i>         | FAR1             | KI421658                | AFAF007839-RA*<br>AFAF005284-RA*                   | <b>242</b>               | 7104         | <b>158</b> | 87  | <b>128</b> | 396 | <b>140</b> | 21328 | <b>120</b> | 6834 | <b>82</b> | 77  | <b>161</b> | 533 | <b>107</b> |
| <i>Anopheles funestus</i>        | FUM OZ           | KB668761                | AFUN003461-RA*<br>AFUN003462-RA*                   | <b>237</b>               | 4686         | <b>158</b> | 100 | <b>128</b> | 369 | <b>150</b> | 14906 | <b>123</b> | ni   | <b>ni</b> | ni  | <b>160</b> | 419 | <b>107</b> |
| <i>Anopheles merus</i>           | MAF              | AXCQ01003868            | AMEM003822-RA*<br>AMEM010034-RA*                   | <b>ni</b>                | ni           | <b>158</b> | 144 | <b>131</b> | 399 | <b>150</b> | 16673 | <b>126</b> | 6026 | <b>82</b> | 67  | <b>161</b> | 504 | <b>107</b> |
| <i>Anopheles minimus A</i>       | MINIMUS          | KB663610                | AMIN004016-RA*<br>AMIN004017-RA*                   | <b>238</b>               | 5206         | <b>158</b> | 91  | <b>128</b> | 354 | <b>149</b> | 16342 | <b>120</b> | 4309 | <b>82</b> | 76  | <b>161</b> | 396 | <b>107</b> |
| <i>Anopheles quadriannulatus</i> | SANGQUA          | KB665398                | AQUA001555-RA*<br>AQUA001554-RA*                   | <b>247</b>               | 6096         | <b>158</b> | 135 | <b>131</b> | 405 | <b>150</b> | 16266 | <b>126</b> | 7133 | <b>82</b> | 67  | <b>161</b> | 501 | <b>107</b> |
| <i>Anopheles sinensis</i>        | China            | AS2_scf7180000695652    | ASIC005793-RA*<br>ASIC005790-RA*                   | <b>196*</b>              | 4716         | <b>158</b> | 96  | <b>128</b> | 324 | <b>143</b> | 12407 | <b>123</b> | 5553 | <b>81</b> | 183 | <b>161</b> | 415 | <b>107</b> |
| <i>Anopheles stephensi</i>       | Indian           | scaffold_00054          | ASTEI07423-RA*<br>ASTEI07424-RA*                   | <b>247</b>               | 6576         | <b>158</b> | 94  | <b>128</b> | 355 | <b>149</b> | 15659 | <b>128</b> | 3753 | <b>84</b> | 80  | <b>161</b> | 415 | <b>113</b> |
|                                  | SDA-500          | KB664622                | ASTE001379-RA*<br>ASTE001380-RA*                   | <b>247</b>               | 6561         | <b>158</b> | 94  | <b>128</b> | 355 | <b>149</b> | 15951 | <b>128</b> | 3751 | <b>84</b> | 80  | <b>161</b> | 415 | <b>113</b> |
