# Supplementary material for: Unravelling the Evolution of the Allatostatin-Type A, KISS and Galanin Peptide-Receptor Gene Families in Bilaterians: Insights from Anopheles Mosquitoes
Source: PubMed Central journal article supplement (PMC4489612; doi:10.1371/journal.pone.0130347), 2015-07-02
Supplement: pone.0130347.s007.pdf [file pone.0130347.s007.pdf]

| Species                          | Strain  | Chromosome/<br>Scaffold | Predicted<br>Transcripts                           | E1                         | I1              | E2                       | I2           | E3                       | I3    | E4         |
|----------------------------------|---------|-------------------------|----------------------------------------------------|----------------------------|-----------------|--------------------------|--------------|--------------------------|-------|------------|
| <i>Anopheles gambiae</i>         | PEST    | 2R<br>(sense)           | AGAP001773-RA                                      | <b>549</b>                 | 201254          | <b>240</b>               | 2834         | <b>159</b>               | 10241 | <b>102</b> |
|                                  |         |                         | AGAP001773-RB                                      | <b>549</b>                 | 128245          | <b>270</b>               | 3373         | <b>159</b>               | 10416 | <b>102</b> |
|                                  |         | 2R<br>(antisense)       | AGAP001773-RC                                      | <b>549</b>                 | 42200           | <b>270</b>               | 5121         | <b>159</b>               | 10099 | <b>102</b> |
|                                  |         |                         | AGAP001774-RA                                      | <b>ni</b>                  | ni              | <b>270</b>               | 3443         | <b>59</b>                | 10045 | <b>102</b> |
| <i>Anopheles coluzzii</i>        | Yaoundé |                         | Our study                                          | <b>549</b>                 | ni              | <b>272</b>               | ~3500        | <b>157</b>               | ni    | <b>102</b> |
| <i>Anopheles arabiensis</i>      | Dongola | KB704673<br>(sense)     | AARA002223-RA*<br>AARA002224-RA*<br>AARA002225-RA* | <b>548</b>                 | 49291<br>130556 | <b>239</b><br><b>228</b> | 3304<br>3450 | <b>171</b><br><b>171</b> | 10008 | <b>104</b> |
|                                  |         | KB704673<br>(antisense) | AARA002221-RA*<br>AARA002222-RA*                   | ni                         | ni              | <b>272</b><br><b>277</b> | 3327<br>4051 | <b>171</b><br><b>171</b> | ni    | <b>ni</b>  |
| <i>Anopheles atroparvus</i>      | EBRO    | KI421888                | AATE013630-RA*<br>AATE019696-RA*                   | <b>537</b>                 | 30418           | <b>213</b>               | 4752         | <b>162</b>               | 17124 | <b>104</b> |
| <i>Anopheles darling</i>         | Coari   | Scaffold_130            | ni                                                 | <b>542</b>                 | 33527           | <b>240</b>               | 3601         | <b>163</b>               | 10335 | <b>104</b> |
| <i>Anopheles dirus A</i>         | WRAIR2  | KB672868                | ADIR003427-RA*<br>ADIR003426-RA*                   | <b>549</b>                 | 46683           | <b>272</b>               | 3989         | <b>162</b>               | 12706 | <b>104</b> |
| <i>Anopheles minimus A</i>       | MINIMUS | KB663610                | AMIN003195-RA*<br>AMIN003194-RA*                   | <b>549</b>                 | 40039           | <b>272</b>               | 3383         | <b>162</b>               | 11489 | <b>104</b> |
| <i>Anopheles quadriannulatus</i> | SANGQUA | KB667500<br>(sense)     | AQUA004119-RA*<br>AQUA004120-RA*<br>AQUA004121-RA* | <b>548</b>                 | 56495<br>198383 | <b>271</b><br><b>264</b> | 3356         | <b>175</b>               | 10281 | <b>104</b> |
|                                  |         | KB667500<br>(antisense) | AQUA004118-RA*                                     | <b>119*</b><br><b>119*</b> | ni<br>ni        | <b>272</b><br><b>272</b> | ni           | <b>ni</b>                | ni    | <b>ni</b>  |
| <i>Anopheles sinensis</i>        | China   | KI398091                | ASIS005833-RA*<br>ASIS011825-RA*                   | <b>537</b>                 | 24787           | <b>267</b>               | 1616         | <b>163</b>               | 8399  | <b>104</b> |
| <i>Anopheles stephensi</i>       | Indian  | Scaffold_00002          | ASTEI00480-RA*<br>ASTEI00481-RA*                   | <b>545</b>                 | 39899           | <b>270</b>               | 3687         | <b>162</b>               | 17119 | <b>104</b> |
|                                  | SDA-500 | KB664432                | ASTE010678-RA*<br>ASTE010679-RA*                   | <b>545</b>                 | 38835           | <b>270</b>               | 3686         | <b>162</b>               | 12642 | <b>104</b> |
